# Supplementary material for: RiceChain-Plus: an enhanced framework for blockchain-based rice supply chain systems-ensuring security, privacy, and efficiency
Source: PeerJ journal article supplement (doi:10.7717/peerj-cs.2926), 2025-06-11
Supplement: DatasetDocumentation.pdf [file DatasetDocumentation.pdf]

# RiceChain-Plus Dataset Documentation

## Overview

This dataset accompanies the manuscript titled "**RiceChain-Plus: An Enhanced Framework for Blockchain-Based Rice Supply Chain Systems—Ensuring Security, Privacy, and Efficiency.**" It provides a comprehensive collection of data that supports the evaluation and analysis of the RiceChain-Plus framework, a blockchain-based solution tailored for the rice supply chain.

## Files Included

- **Device Data:** Information about devices used in the blockchain network.
  - **Transaction Cost:** Costs associated with various interactions across tests.
  - **Execution Cost:** Costs related to the execution of transactions.
  - **Gas Consumption:** Data on gas consumption for transactions.
  - **Energy Consumption:** Energy usage metrics in Joules.
  - **Execution Time:** Time taken for executing transactions.
  - **Transaction Time:** Time taken for processing transactions.
  - **Transaction Throughput:** Transaction throughput measurements.
- 

## Data Structure Documentation

### 1. Device Data

- **Description:** Contains cryptographic information related to devices involved in the RiceChain-Plus network.
- **Columns:**
  - **Device Name:** Identifier for each device.
  - **Private Keys:** Cryptographic keys used for secure communication.
  - **Device ID:** Unique identifier for devices in the network.
  - **Message Hash:** Hash value for messages sent by the device.
  - **Signature:** Digital signature for transaction validation.

#### Example:

| Device Name | Private Keys | Device ID   | Message Hash | Signature   |
|-------------|--------------|-------------|--------------|-------------|
| device_1    | 0xacf00b...  | 0xc1ab2e... | 405c255...   | 0x30dffc... |

### 2. Transaction Cost

- **Description:** Provides the cost of transactions across different tests.
- **Columns:**

- **Tests:** Identifier for each test scenario.
- **Intrn-1 to Intrn-100:** Cost metrics for various intrusions and interactions.

**Example:**

**Tests Intrn-1 Intrn-2 ... Intrn-100**

test 1 95787 33750 ... 95787

### 3. Execution Cost

- **Description:** Contains data on the execution cost of transactions.
- **Columns:**
  - **Tests:** Identifier for each test scenario.
  - **Intrn-1 to Intrn-100:** Execution cost metrics for different interactions.

**Example:**

**Tests Intrn-1 Intrn-2 ... Intrn-100**

test 1 73331 71294 ... 75607

### 4. Gas Consumption

- **Description:** Details the gas consumption for each transaction, crucial for blockchain analysis.
- **Columns:**
  - **Tests:** Identifier for each test scenario.
  - **Intrn-1 to Intrn-100:** Gas consumption metrics.

**Example:**

**Tests Intrn-1 Intrn-2 ... Intrn-100**

test 1 110156 38813 ... 110156

### 5. Energy Consumption

- **Description:** Provides data on energy consumption in Joules for each interaction.
- **Columns:**
  - **Interactions:** Identifier for each interaction type.
  - **Avg Execution Cost:** Average execution cost across interactions.
  - **Energy Consumption (Joules):** Energy usage metrics.

**Example:**

### Interactions Avg Execution Cost Energy Consumption (Joules)

|         |          |          |
|---------|----------|----------|
| Intrn-1 | 44165.57 | 0.000093 |
|---------|----------|----------|

## 6. Execution Time

- **Description:** Lists the time taken for executing transactions, measured in milliseconds.
- **Columns:**
  - **Interactions:** Identifier for each interaction type.
  - **Execution Time (ms):** Execution time in milliseconds.

**Example:**

### Interactions Execution Time (ms)

|         |           |
|---------|-----------|
| Intrn-1 | 44.165571 |
|---------|-----------|

## 7. Transaction Time

- **Description:** Contains data on transaction time in seconds for different interactions.
- **Columns:**
  - **Interactions:** Identifier for each interaction type.
  - **Avg Execution Cost:** Average execution cost across interactions.
  - **Execution Time (ms):** Execution time in milliseconds.
  - **Transaction Time (s):** Transaction time in seconds.

**Example:**

### Interactions Avg Execution Cost Execution Time (ms) Transaction Time (s)

|         |          |           |           |
|---------|----------|-----------|-----------|
| Intrn-1 | 44165.57 | 44.165571 | 14.044166 |
|---------|----------|-----------|-----------|

## 8. Transaction Throughput

- **Description:** Details the transaction throughput measured in transactions per second.
- **Columns:**
  - **Interactions:** Identifier for each interaction type.
  - **Transaction Time (s):** Transaction time in seconds.
  - **Transaction Throughput (trans/second):** Throughput rate.

**Example:**

### Interactions Transaction Time (s) Transaction Throughput (trans/second)

|         |           |          |
|---------|-----------|----------|
| Intrn-1 | 14.044166 | 0.071204 |
|---------|-----------|----------|

## Data Dictionaries

### Device Data Dictionary

- **Device Name:** Name of the device.
- **Private Keys:** Cryptographic private keys used by the device.
- **Device ID:** Unique device identifier in the network.
- **Message Hash:** Hash value for messages sent by the device.
- **Signature:** Digital signature for authenticating transactions.

### Transaction and Execution Data Dictionary

- **Tests:** Identifiers for each test scenario.
- **Intrn-1 to Intrn-100:** Interaction numbers representing different test scenarios and measurements.
- **Avg Execution Cost:** Average cost of executing transactions across scenarios.
- **Energy Consumption (Joules):** Energy usage in Joules for specific interactions.

### Performance Metrics Data Dictionary

- **Execution Time (ms):** Time taken for executing transactions, measured in milliseconds.
- **Transaction Time (s):** Time taken for processing transactions, measured in seconds.
- **Transaction Throughput (trans/second):** Number of transactions processed per second.
