# Supplementary material for: RiceChain-Plus: an enhanced framework for blockchain-based rice supply chain systems-ensuring security, privacy, and efficiency
Source: PeerJ Comput Sci. 2025 Jun 11;11:e2926. doi: 10.7717/peerj-cs.2926 (PMC12192870; doi:10.7717/peerj-cs.2926)
Supplement: Supplemental Information 1 [file peerj-cs-11-2926-s001.xlsx]

## Sheet: Device data
Device name	Private keys	Device ID	Message Hash	Signature
device_1	0xacf00bd9276ea5dfbea6724a4ed1dc3d8961befe1c100d29aef41ce663973d90	0xc1ab2e6694fcf29716db6b9a5897b25861df980c9141c6b7fc5ecf4fab2c5f0c	405c255fdbcce5a68ef7a1600050705fd2cc9f175ac6da0cc69ae1e0b9e208ed	0x30dffccb4725aa8ee63acab926907bcf4a561e70f740fa8de9d5fc214bf671f84d6c30adf531dd1688299aa015cd7b35e1e5a892104b4350e6091bf8bd713b5b1b
device_2	0xcb7e48a15854188cb5604e78ec4860341085782dac4e0f36a69d9db4e802b4b3	0xd6e1999503a9155109b1dacde61cdf58c0eb57d510785c1cdf4d31f31fe74731	86e3505ea674763b04e0a41d54753db74db7076800122f47bb05d9460cb84a36	0x212e2953b4b92806ccbd29ad441923a45d13681fa01dee37ebacf1f14a9de44113c9532dd115a9530acdca13d67e493dcdf219e9a875fef6a3352ee3a390dd081c
device_3	0xa98a7d7d663d47038d0f312f0ef3eccd0098ce6dee1adff8d5ad869d906bc1ad	0x4a39f2c5b446624faf476abbd2e25d8dbe796f5f705d7980d9a584f639595512	5666b472e360ee77a5d9881c2958a77015a3a9712e2a55642d0007a3538df5db	0xa5e1db3f429f098da194988ea1d13f47499287f981082aa2aa4c713f6bf8c5243066295701deffa2399568783243750b3283e454ac2ed8a65b68549b68c06b371c
device_4	0x7ff1f2de20c34bc58ce9f1a191fe0e710fb40007306310cadf6bbeed82b2d39f	0xd12438236b6dbb5a8fc2dc391d762e2d08d945fe6a0e7a3ef97bbfb387f96a57	46981505c7446cfc3c864766d9751cae6b643975fb42b9c2b9591f3c395eeac5	0xc136fc99df86dd372c207eddf73a2cbe10702215f0275825ba51185a511b215f5e5d9e0058828892ea042d961852f7ec8f46ba8359e54eaf10c3d08f97adec151c
device_5	0x4c01f354c39893224fb13ac0dc8e2e7fe3d9a955fb0c09d6c4bad63ee5fbf04c	0xbd86840c22a830e0582cf699c7dc6bec0b81eb9cae7d5da11d4ed539ee3e1fcf	d309681c1d9ec0b44810cda2b9630511060d08719c8d721a1e273b955e3da34c	0x325b4f460d87a1bd5ae50dc011e165f92894c6e300e64a73d60225ee0a50403c4dde564c5de766f8b28c011ae63234b7dd4194e0a65f7ce1cc7bfa745964f7ff1c
device_6	0x7794266ed997ace947546278f615009a2c4a99b9f47f4aebc9203e651e22e03a	0x2df0952b1c310af3fb6b1dd6d4746197ec70c30555dc5665d33cae7f893fce92	ee65d05a5031bc9309730e84fa55d6939533bf85115880c964dd9fc4efb35a20	0x553115c04d4803b86478eb95ec04b558e3248eb30a330bda35cbe1711d0046631b0c8c39c80094fe2984aac29704cc3ea203e763d42d7fa5860801a664e5265a1c
device_7	0x3d7be186dbbc56605580b7d622495f3abceb57314186935188391935010afddf	0x6c75e6cd1f69a2e0ea6c2fd85efaf2fa12a758fae7ba853337ce17d663fb368e	242d109c35338d717c236bff92e3f995819b21e1587bd0f675fdefe5967fe2c1	0xb40565741a1447dc9d81b0818d8000e8ce53fbe205eb06e0defe8b4df929552d653b68e19a9fe3da1bb9da27866cae9c4f6e5b1f7c9dd227480769b98b1a11e71b
device_8	0x0f5eef64176a538dba2730ba639e0a680445ba9b89ca4cb12f2bbf4e94ed904e	0x28d57a79972047813c7f5860863df6176a2f62f8fa29a52e352dd8779b1e88f8	8dd1f109f4a16495cadf0ea584e24a6008bd53d9bb0cf973d0f1b52aef1a9d03	0x66b5e1ff90385a235744527e4109a317d8cab1b5736c08ce66bc55bf4bcd80cf4b841323f94ce21d11bf414f8c0d8ffce246ee1fe8cbc08215540447395383881b
device_9	0x295d2bef1c2575e91f601cec7a9fa0af5c9175ec193810121820ea25f1138ed8	0xcb1b3c72ea73262e8f38ab7f21a2419dfafca14cdb00ad5ecf52c2c012d8316d	509fca2dfaee9bcfdd1b55fc2499bfd5351794d4b8a6c224fdb914631d9afb6f	0x27aaedc8f58d425ca6ffee6b885f4bcd3862f47c8db0480b8553058ba57e406b277dbcfdb92e51e288d7cb76521aefa9b089717e0c454cc3accaf3f493140ca21c
device_10	0x4982022fae92a0786439720509b187271469acc4e01394e7a42dd592695f7e7a	0x98213a131482ab478ac41c5bbf752eaa68a9e7bf1268a58f1b1b2249afe67ec4	55668d29f35e7b607cb1b1d129e4c16607f77a7aa312bf14098471d71aa02090	0xa76eeea867ee92bbe6c83f8b239c2a4334ab6738eb9e5ac63e99bd6078f1b3b116cf14e1a5853aefeaefd264dcc7217f7a54424c7b50d7be7f559dca7913f7ff1b
device_11	0x642e5eb079381d856016d5d8727a6a070686f5dd3c990dd6a65fcd6e9b9b5342	0x4c69a1a4aa176bf01a77431f81f38cdbbe7b62d0e4c417252f6a50131a9893e8	d550140d712f9475bfc5cb1bc3ecceb2275df5d42ec9dd75199eb0aa2e3a666f	0x67291e7bebd879d78c67b608f3d6d1d2ad7414c22696f45ad44b4f23f9e0a6376573f76dd18b2b89f2d24645c355ede90e693c7c7eb0f34b831930c4b00d0a431c
device_12	0x186eff3a727aeac84868176603d9e9a76deeb524e06b14305ff84d08d84d8f94	0xaf00d78865f3235a371223423295f43c560afd091ca9fc6629ac8ec75a3fef29	852ec1c5c39cf9aff2354497024b544257fee0dac9a03a601af5e1922a851d1f	0xe42dbc1b4e65976dc3c37e7dc87a55e1bdf5b4452c409a1c03794899dd06e8ab5205ea6b552e87eb9b21771d31c8165cc7191c88c5a1362bd942285a0612ed341b
device_13	0xaa3597926446aafef6819c18d7533724be44a8bff374b5da25626357ccc5cf43	0xf009d9555815c7c5ddd164f8fa9feabf60cb3317dd53006a42e30e56dafac5b5	866f567619e79d730bb4e8494a756be49ff0b9ac555661a66a288f80aa9d19f6	0x7a848eb6d9aca73aa06551fad77a31d8d4eab26b900512d292c7f16312af207839ab4eb890b9aed40b71f14b6329b07080eb1d4a9bc313ac310e67af6c16da281b
device_14	0x0364dad0734a802e8b54c8bec95d392b169ce346067dfd7eccf223fa2c6e471d	0x9da5e7bdf8d484c0768c1dbc228fb6aba4980013d0a171a067420ee882ea41d5	33fa7fbe155e9903b22340180e79b8d31151f005861df61e749deb13bdc434ae	0x134666ddc7ebe4cf10b5b0a4f08d95009d14fff3c8e48623a48ef77363e18f5a6adec28da2685b3f0ca1b8c20fcd23e9f65d758322ba51505ed0d15b66f60f551b
device_15	0x075671e6e867cd5e25c444a1e3e094537adaa1efe2def9f696339e4cfbc6cc6d	0x9fee80ac11a1f3db0c13733f0bbeb8a57a75ae9bf811e4e1c862a3c0507bee6a	81f4673032c2e8f70ee4578577ee4d14e24db6f119b37f90bb7003edbfe53be2	0x6d05f7a4df0ff38e6961d79184cdd1fddc6675d7a0cbc01566825d12aceb30215b08a0400018236f955f297675c17f4d8738933e303438f221271b403aff7de91b
device_16	0x2550863b4b7b5f951ced22eb7df789b894cd39c5280ffd3ce2a24145ec88feaf	0xf5f1988937769d454ddcf17997ed4963c61ee42e7e62936c7a9ef8449fbbc476	bcf61987da0a8c78dc00a46c7d9259a1ddfbd001509d574dcda7476ef7227b97	0x8c13f17609b88b772e74325d1f3bcf74b681552fb11293d158065ea34a0f7db12c929c7cbe49cfe8f6a66739c7f08ce3150370e9f9344025c400eb51056a554b1c
device_17	0x7a7c5ab7733c0867b000fa91cd7bfdd0cc51b1e6d783bb8ea5374489d0f5b59e	0xa9a857a2eb92d99cf9d31e7538895d1892f19c923b85d51969ec9009359015a1	e578782c68b53e181eb04ce6b0a42fe8141af18f26f888d7228d61cfffa0c4f9	0xd41d3eb56a9261bd00b56c77ff8a27a5bf647e88743de250bfb5a5014eb1cb2b5724554a2faa9323a7f13822b565070f34d6111b9545d54d2fa1dbe99d23eaeb1b
device_18	0xf95ad5cdf974d5037f95a707bfbd7ddb5f366cd588e1f92efc35223ccc0b844a	0xe9a8faf7a6e8b5c2f5e8c86f604d35bf2add19ab8293c14a28f6bf3ef310ae15	1d9be849f479ed0668a894cf5ab30f2369a987bd9468f3807d8f4f0ac5fdf74a	0xd1bd95800cdee51142e370020886f894303d14693de36d673bbb3e1dc84c2a9a76c7a7be8ec1e0767c440237071e0d981b3ecdfc1e893f0c1138bb877f96659c1c
device_19	0x6cb1e71a02e900437438808b0dda14c4afad62997b11edba689f76b8ff4a1f41	0xc9888e3ffd76fe079bae4bf9e0d3179ed13901656abe524a6c94c563767294ac	0e20f9155a7830212bedf95c689fbc868977c3ef5397687c1606ad9be88fb856	0xf6144664036c0cc1e5f63c0f68934de6b64db2fe25a111295ff204a8341a9f627bdc5d7dd6dad53c77bf356de1cd318046d82a4bcf35626390a5d2816a3e95f01b
device_20	0xb5320d33a7257c224f9d6324f48e5dfa12aa09cbad7817a5f68b049c16be52f2	0xdf796b6b56cd5364209ec9b295ea60db849f2322ec7d33c9cf2c65d28053002d	ef91a83e760c952c9371ff6fcb0d291d25f3eac510d7f28fca6bde6f0c3f9257	0x53c4e32035fa9f7a8c02e871f084f501872822b6b4ad54a92e1c5f69ca9039d32718091ce25300e617b2fc6871c9a148d9893bd8ee9a98234272ca07a44888681b
device_21	0x2c38d331bc55a57c15bd067f88777402783261b4ad4b87cf4cd82938732c04e1	0xde06b156cdb0394d96291638d1268fa317a033ffcecfa0ebe202c160d65cab94	788dcbf086c7bd05fe5c8e5a975fcdfad69f3cafb87ff3c64cb04dc58bc98dae	0x1b9560fb72d4f0b426c5be7a01052c972939bf62cfbee3f87f2afb75ade46d5f2d44fba5332842cb62ee19266c008a37d5c169fc09dc76c8f285ce64f9a88e061c
device_22	0x92152109dc8bf882eed5b44dd74212b0b136ddff2b62cd2d2d8c3b8c4a17f366	0x9583e566f23f5913a4d224f38d434ca927a081b9c354a469b9728bb283f202ae	bc9e12daa96e04d3ea5bb55559caf555a14fcc2b82cf5ae8d44e223b75b77671	0x422b8ebd21c7f9a0c2ef8ece819f0218d5cb4dc453b3473348d7c432ef8e76c8466d8c15a0022df14237e466e98b3a9140753dc3760f077f7cf3e46c1946034d1c
device_23	0xe88b924c2d89de9086d9f35744dec579af653dfe3fccda5beb2d3e1243224853	0x2e13474dbadbf9b1f1e610c206621f588304f90c5f4c60955c160b73a8e421a2	c2818f62a342d6108968fab1a1f4e27ffe07aff750f99ae3007868003a183582	0xe7a03691e33d481fdf3d9f570554adc84a64cb30d4c26399698dd568c924b5ab2c3a30d369f4f06715afa3298dc1a262a21dad3045e97284041071892e01ab5d1c
device_24	0x01a01be79ffc52c50d2f2a5ca37578cac214b062991716510be44b9c1c450fc1	0x44b3244b5864f82ebf364537442999257a30af3f98ba78afc265e9e27d91586c	df1256c91d5783d09c398bdbfa1d69bf0f40c3b47bff36688a77c413e35e609c	0x7db7329ed35d17809e881f9adcfff3e33f986b9c4b187751fa38611d070f530e6c560541dc2216685153e7f1274bbafb8c11aa1da62370cb49bbb56628519d971b
device_25	0x40184fbd6ba339ced6f8db227daf2f7cdfaff6c6d6508d7c75ad422e98aa73d7	0x3c2739b866be02555084e28c171820ef21d2b3f4078baaa94415b48f0a2119af	49694704114451a05f03068a93108149515d0a9f6eaffbcbe4b323532255c89f	0x40f472f3789985cf1e27361fbe1db6924f94c242199338b2314fbbe9f91b6ec738d84a85338c39df9b7c0ccee15106aafac27874da63bd8a581148b9db8697961c
device_26	0x82f44fbe0fec99067cbca4a60aa600a0100ed7654121434831183f60863c6865	0x1b08c1808e31ee7cdbfa81985e9bdfa21927ada6951f869ea871922a463c2125	f4758f07cea2ee1ce88b5823a1d6e12976be4a93e73cf3f78d67af95e8bfcbed	0x78c270054f0516a7dcb5bc9c47a63bdab8dbd25627384a9301fec568dea74ecd78b0f622079a2bc272fee912339995073a4e901bb86bf19fe9cbb864022602331b
device_27	0x9ca92e5a76f68065667805afcd38524d425183a8d22044dadae36944dcf75282	0x1ccb4d4f9221d6ea6a4f49df09223bd99d2cce9a204ebb83f2b736a16da7fee4	bb968dfed8f7aa37df7032f58cd4a075b3cdb501ea99951f515802626b14547d	0x008aab79713313c9ee7e9bee9b4dcbfb99e39ded2aa6a8b08c42faacc3440fd737424bac38e1ba5c0080a397b64bec6b8d62c9d27f46ecd9538df21591e7d6311b
device_28	0x6b3c67509db64c82cd75350ea6ff4453aae7b9880b1c878f5222536e210838d2	0xc67e9756b8306674d195ab82dc5b549eed013211b14f095e1ac7646b02018ebb	101ee22e2b49630a1325c246e179ca586464555d18ccc75358a63c802c678aa6	0x736e6e1a63fd9531562917cd8fdee77fa488e3542faabfb5268375aefb6f1e2037024af8e7c28efa85cd3a22551aad86dc92b59dcf7fe440acd92e41a6a7309a1b
device_29	0x08261d4b519b1baa69d1c6a7140fe630890344b1b175384e554ab55629942be3	0x599c754e0a4d71b53f868eca44f801471ab041d5c8f1f19d4f3d45a1d9c9cf05	3f7ad1809373cc7ce4b54e4bad4f2c97a7e7ed0bc5e8d935353b853d98a2d83b	0x4d8907e9bbcb5fa7ae13696f3171e68d46b7583249e1ac4c3e66a78371047e072435a6c13825eb082a955516434df1d7035ed943bb7c8d8d989cc74d2eab5fb61b
device_30	0xbd25e2062d3427de7e826a4430383be894f37ad1bbbacae8d93e5616b6497d8e	0x4a2a75a7d1ecf64690d1383b631bedf3dcd0eb9fbc586457f911d8b947cc49a3	fcfe647eca3789d244f2f6e6ae47a6ae6f576de360bd29f7d6a37711b6a6c846	0x39c8325e3c51c38467328f96d12bb97e9194b818de2b19e6339b5dd22b712a524a2875f68a8f28be60792491cf65357acdb09dfcd18e21f41e0119a39dd35e6c1b
device_31	0xacf00bd9276ea5dfbea6724a4ed1dc3d8961befe1c100d29aef41ce663973d91	0xc1ab2e6694fcf29716db6b9a5897b25861df980c9141c6b7fc5ecf4fab2c5f0c	405c255fdbcce5a68ef7a1600050705fd2cc9f175ac6da0cc69ae1e0b9e208ed	0x30dffccb4725aa8ee63acab926907bcf4a561e70f740fa8de9d5fc214bf671f84d6c30adf531dd1688299aa015cd7b35e1e5a892104b4350e6091bf8bd713b5b1b
device_32	0xcb7e48a15854188cb5604e78ec4860341085782dac4e0f36a69d9db4e802b4b4	0xd6e1999503a9155109b1dacde61cdf58c0eb57d510785c1cdf4d31f31fe74732	86e3505ea674763b04e0a41d54753db74db7076800122f47bb05d9460cb84a37	0x212e2953b4b92806ccbd29ad441923a45d13681fa01dee37ebacf1f14a9de44113c9532dd115a9530acdca13d67e493dcdf219e9a875fef6a3352ee3a390dd081c
device_33	0xa98a7d7d663d47038d0f312f0ef3eccd0098ce6dee1adff8d5ad869d906bc1ad	0x4a39f2c5b446624faf476abbd2e25d8dbe796f5f705d7980d9a584f639595513	5666b472e360ee77a5d9881c2958a77015a3a9712e2a55642d0007a3538df5db	0xa5e1db3f429f098da194988ea1d13f47499287f981082aa2aa4c713f6bf8c5243066295701deffa2399568783243750b3283e454ac2ed8a65b68549b68c06b371c
device_34	0x7ff1f2de20c34bc58ce9f1a191fe0e710fb40007306310cadf6bbeed82b2d39f	0xd12438236b6dbb5a8fc2dc391d762e2d08d945fe6a0e7a3ef97bbfb387f96a58	46981505c7446cfc3c864766d9751cae6b643975fb42b9c2b9591f3c395eeac6	0xc136fc99df86dd372c207eddf73a2cbe10702215f0275825ba51185a511b215f5e5d9e0058828892ea042d961852f7ec8f46ba8359e54eaf10c3d08f97adec151c
device_35	0xacf00bd9276ea5dfbea6724a4ed1dc3d8961befe1c100d29aef41ce663973d91	0xc1ab2e6694fcf29716db6b9a5897b25861df980c9141c6b7fc5ecf4fab2c5f0c	405c255fdbcce5a68ef7a1600050705fd2cc9f175ac6da0cc69ae1e0b9e208ed	0x30dffccb4725aa8ee63acab926907bcf4a561e70f740fa8de9d5fc214bf671f84d6c30adf531dd1688299aa015cd7b35e1e5a892104b4350e6091bf8bd713b5b1b
device_36	0xcb7e48a15854188cb5604e78ec4860341085782dac4e0f36a69d9db4e802b4b4	0xd6e1999503a9155109b1dacde61cdf58c0eb57d510785c1cdf4d31f31fe74732	86e3505ea674763b04e0a41d54753db74db7076800122f47bb05d9460cb84a37	0x212e2953b4b92806ccbd29ad441923a45d13681fa01dee37ebacf1f14a9de44113c9532dd115a9530acdca13d67e493dcdf219e9a875fef6a3352ee3a390dd081c
device_37	0xa98a7d7d663d47038d0f312f0ef3eccd0098ce6dee1adff8d5ad869d906bc1ad	0x4a39f2c5b446624faf476abbd2e25d8dbe796f5f705d7980d9a584f639595513	5666b472e360ee77a5d9881c2958a77015a3a9712e2a55642d0007a3538df5db	0xa5e1db3f429f098da194988ea1d13f47499287f981082aa2aa4c713f6bf8c5243066295701deffa2399568783243750b3283e454ac2ed8a65b68549b68c06b371c
device_38	0x7ff1f2de20c34bc58ce9f1a191fe0e710fb40007306310cadf6bbeed82b2d39f	0xd12438236b6dbb5a8fc2dc391d762e2d08d945fe6a0e7a3ef97bbfb387f96a58	46981505c7446cfc3c864766d9751cae6b643975fb42b9c2b9591f3c395eeac6	0xc136fc99df86dd372c207eddf73a2cbe10702215f0275825ba51185a511b215f5e5d9e0058828892ea042d961852f7ec8f46ba8359e54eaf10c3d08f97adec151c
device_39	0x4c01f354c39893224fb13ac0dc8e2e7fe3d9a955fb0c09d6c4bad63ee5fbf04c	0xbd86840c22a830e0582cf699c7dc6bec0b81eb9cae7d5da11d4ed539ee3e1fcf	d309681c1d9ec0b44810cda2b9630511060d08719c8d721a1e273b955e3da34c	0x325b4f460d87a1bd5ae50dc011e165f92894c6e300e64a73d60225ee0a50403c4dde564c5de766f8b28c011ae63234b7dd4194e0a65f7ce1cc7bfa745964f7ff1c
device_40	0x7794266ed997ace947546278f615009a2c4a99b9f47f4aebc9203e651e22e03a	0x2df0952b1c310af3fb6b1dd6d4746197ec70c30555dc5665d33cae7f893fce93	ee65d05a5031bc9309730e84fa55d6939533bf85115880c964dd9fc4efb35a21	0x553115c04d4803b86478eb95ec04b558e3248eb30a330bda35cbe1711d0046631b0c8c39c80094fe2984aac29704cc3ea203e763d42d7fa5860801a664e5265a1c
device_41	0x3d7be186dbbc56605580b7d622495f3abceb57314186935188391935010afddf	0x6c75e6cd1f69a2e0ea6c2fd85efaf2fa12a758fae7ba853337ce17d663fb368e	242d109c35338d717c236bff92e3f995819b21e1587bd0f675fdefe5967fe2c2	0xb40565741a1447dc9d81b0818d8000e8ce53fbe205eb06e0defe8b4df929552d653b68e19a9fe3da1bb9da27866cae9c4f6e5b1f7c9dd227480769b98b1a11e71b
device_42	0x0f5eef64176a538dba2730ba639e0a680445ba9b89ca4cb12f2bbf4e94ed904e	0x28d57a79972047813c7f5860863df6176a2f62f8fa29a52e352dd8779b1e88f9	8dd1f109f4a16495cadf0ea584e24a6008bd53d9bb0cf973d0f1b52aef1a9d04	0x66b5e1ff90385a235744527e4109a317d8cab1b5736c08ce66bc55bf4bcd80cf4b841323f94ce21d11bf414f8c0d8ffce246ee1fe8cbc08215540447395383881b
device_43	0x295d2bef1c2575e91f601cec7a9fa0af5c9175ec193810121820ea25f1138ed9	0xcb1b3c72ea73262e8f38ab7f21a2419dfafca14cdb00ad5ecf52c2c012d8316d	509fca2dfaee9bcfdd1b55fc2499bfd5351794d4b8a6c224fdb914631d9afb6f	0x27aaedc8f58d425ca6ffee6b885f4bcd3862f47c8db0480b8553058ba57e406b277dbcfdb92e51e288d7cb76521aefa9b089717e0c454cc3accaf3f493140ca21c
device_44	0x4982022fae92a0786439720509b187271469acc4e01394e7a42dd592695f7e7a	0x98213a131482ab478ac41c5bbf752eaa68a9e7bf1268a58f1b1b2249afe67ec5	55668d29f35e7b607cb1b1d129e4c16607f77a7aa312bf14098471d71aa02091	0xa76eeea867ee92bbe6c83f8b239c2a4334ab6738eb9e5ac63e99bd6078f1b3b116cf14e1a5853aefeaefd264dcc7217f7a54424c7b50d7be7f559dca7913f7ff1b
device_45	0x642e5eb079381d856016d5d8727a6a070686f5dd3c990dd6a65fcd6e9b9b5343	0x4c69a1a4aa176bf01a77431f81f38cdbbe7b62d0e4c417252f6a50131a9893e9	d550140d712f9475bfc5cb1bc3ecceb2275df5d42ec9dd75199eb0aa2e3a666f	0x67291e7bebd879d78c67b608f3d6d1d2ad7414c22696f45ad44b4f23f9e0a6376573f76dd18b2b89f2d24645c355ede90e693c7c7eb0f34b831930c4b00d0a431c
device_46	0x186eff3a727aeac84868176603d9e9a76deeb524e06b14305ff84d08d84d8f95	0xaf00d78865f3235a371223423295f43c560afd091ca9fc6629ac8ec75a3fef30	852ec1c5c39cf9aff2354497024b544257fee0dac9a03a601af5e1922a851d1f	0xe42dbc1b4e65976dc3c37e7dc87a55e1bdf5b4452c409a1c03794899dd06e8ab5205ea6b552e87eb9b21771d31c8165cc7191c88c5a1362bd942285a0612ed341b
device_47	0xaa3597926446aafef6819c18d7533724be44a8bff374b5da25626357ccc5cf44	0xf009d9555815c7c5ddd164f8fa9feabf60cb3317dd53006a42e30e56dafac5b6	866f567619e79d730bb4e8494a756be49ff0b9ac555661a66a288f80aa9d19f7	0x7a848eb6d9aca73aa06551fad77a31d8d4eab26b900512d292c7f16312af207839ab4eb890b9aed40b71f14b6329b07080eb1d4a9bc313ac310e67af6c16da281b
device_48	0x0364dad0734a802e8b54c8bec95d392b169ce346067dfd7eccf223fa2c6e471d	0x9da5e7bdf8d484c0768c1dbc228fb6aba4980013d0a171a067420ee882ea41d6	33fa7fbe155e9903b22340180e79b8d31151f005861df61e749deb13bdc434ae	0x134666ddc7ebe4cf10b5b0a4f08d95009d14fff3c8e48623a48ef77363e18f5a6adec28da2685b3f0ca1b8c20fcd23e9f65d758322ba51505ed0d15b66f60f551b
device_49	0x075671e6e867cd5e25c444a1e3e094537adaa1efe2def9f696339e4cfbc6cc6d	0x9fee80ac11a1f3db0c13733f0bbeb8a57a75ae9bf811e4e1c862a3c0507bee6a	81f4673032c2e8f70ee4578577ee4d14e24db6f119b37f90bb7003edbfe53be3	0x6d05f7a4df0ff38e6961d79184cdd1fddc6675d7a0cbc01566825d12aceb30215b08a0400018236f955f297675c17f4d8738933e303438f221271b403aff7de91b
device_50	0x2550863b4b7b5f951ced22eb7df789b894cd39c5280ffd3ce2a24145ec88feaf	0xf5f1988937769d454ddcf17997ed4963c61ee42e7e62936c7a9ef8449fbbc477	bcf61987da0a8c78dc00a46c7d9259a1ddfbd001509d574dcda7476ef7227b98	0x8c13f17609b88b772e74325d1f3bcf74b681552fb11293d158065ea34a0f7db12c929c7cbe49cfe8f6a66739c7f08ce3150370e9f9344025c400eb51056a554b1c
device_51	0x7a7c5ab7733c0867b000fa91cd7bfdd0cc51b1e6d783bb8ea5374489d0f5b59e	0xa9a857a2eb92d99cf9d31e7538895d1892f19c923b85d51969ec9009359015a2	e578782c68b53e181eb04ce6b0a42fe8141af18f26f888d7228d61cfffa0c4f10	0xd41d3eb56a9261bd00b56c77ff8a27a5bf647e88743de250bfb5a5014eb1cb2b5724554a2faa9323a7f13822b565070f34d6111b9545d54d2fa1dbe99d23eaeb1b
device_52	0xf95ad5cdf974d5037f95a707bfbd7ddb5f366cd588e1f92efc35223ccc0b844a	0xe9a8faf7a6e8b5c2f5e8c86f604d35bf2add19ab8293c14a28f6bf3ef310ae16	1d9be849f479ed0668a894cf5ab30f2369a987bd9468f3807d8f4f0ac5fdf74a	0xd1bd95800cdee51142e370020886f894303d14693de36d673bbb3e1dc84c2a9a76c7a7be8ec1e0767c440237071e0d981b3ecdfc1e893f0c1138bb877f96659c1c
device_53	0x6cb1e71a02e900437438808b0dda14c4afad62997b11edba689f76b8ff4a1f42	0xc9888e3ffd76fe079bae4bf9e0d3179ed13901656abe524a6c94c563767294ac	0e20f9155a7830212bedf95c689fbc868977c3ef5397687c1606ad9be88fb857	0xf6144664036c0cc1e5f63c0f68934de6b64db2fe25a111295ff204a8341a9f627bdc5d7dd6dad53c77bf356de1cd318046d82a4bcf35626390a5d2816a3e95f01b
device_54	0xb5320d33a7257c224f9d6324f48e5dfa12aa09cbad7817a5f68b049c16be52f3	0xdf796b6b56cd5364209ec9b295ea60db849f2322ec7d33c9cf2c65d28053002d	ef91a83e760c952c9371ff6fcb0d291d25f3eac510d7f28fca6bde6f0c3f9258	0x53c4e32035fa9f7a8c02e871f084f501872822b6b4ad54a92e1c5f69ca9039d32718091ce25300e617b2fc6871c9a148d9893bd8ee9a98234272ca07a44888681b
device_55	0x2c38d331bc55a57c15bd067f88777402783261b4ad4b87cf4cd82938732c04e2	0xde06b156cdb0394d96291638d1268fa317a033ffcecfa0ebe202c160d65cab95	788dcbf086c7bd05fe5c8e5a975fcdfad69f3cafb87ff3c64cb04dc58bc98dae	0x1b9560fb72d4f0b426c5be7a01052c972939bf62cfbee3f87f2afb75ade46d5f2d44fba5332842cb62ee19266c008a37d5c169fc09dc76c8f285ce64f9a88e061c
device_56	0x92152109dc8bf882eed5b44dd74212b0b136ddff2b62cd2d2d8c3b8c4a17f367	0x9583e566f23f5913a4d224f38d434ca927a081b9c354a469b9728bb283f202ae	bc9e12daa96e04d3ea5bb55559caf555a14fcc2b82cf5ae8d44e223b75b77672	0x422b8ebd21c7f9a0c2ef8ece819f0218d5cb4dc453b3473348d7c432ef8e76c8466d8c15a0022df14237e466e98b3a9140753dc3760f077f7cf3e46c1946034d1c
device_57	0xe88b924c2d89de9086d9f35744dec579af653dfe3fccda5beb2d3e1243224854	0x2e13474dbadbf9b1f1e610c206621f588304f90c5f4c60955c160b73a8e421a3	c2818f62a342d6108968fab1a1f4e27ffe07aff750f99ae3007868003a183583	0xe7a03691e33d481fdf3d9f570554adc84a64cb30d4c26399698dd568c924b5ab2c3a30d369f4f06715afa3298dc1a262a21dad3045e97284041071892e01ab5d1c
device_58	0x01a01be79ffc52c50d2f2a5ca37578cac214b062991716510be44b9c1c450fc2	0x44b3244b5864f82ebf364537442999257a30af3f98ba78afc265e9e27d91586c	df1256c91d5783d09c398bdbfa1d69bf0f40c3b47bff36688a77c413e35e609c	0x7db7329ed35d17809e881f9adcfff3e33f986b9c4b187751fa38611d070f530e6c560541dc2216685153e7f1274bbafb8c11aa1da62370cb49bbb56628519d971b
device_59	0x40184fbd6ba339ced6f8db227daf2f7cdfaff6c6d6508d7c75ad422e98aa73d8	0x3c2739b866be02555084e28c171820ef21d2b3f4078baaa94415b48f0a2119af	49694704114451a05f03068a93108149515d0a9f6eaffbcbe4b323532255c89f	0x40f472f3789985cf1e27361fbe1db6924f94c242199338b2314fbbe9f91b6ec738d84a85338c39df9b7c0ccee15106aafac27874da63bd8a581148b9db8697961c
device_60	0x82f44fbe0fec99067cbca4a60aa600a0100ed7654121434831183f60863c6866	0x1b08c1808e31ee7cdbfa81985e9bdfa21927ada6951f869ea871922a463c2126	f4758f07cea2ee1ce88b5823a1d6e12976be4a93e73cf3f78d67af95e8bfcbed	0x78c270054f0516a7dcb5bc9c47a63bdab8dbd25627384a9301fec568dea74ecd78b0f622079a2bc272fee912339995073a4e901bb86bf19fe9cbb864022602331b
device_61	0x9ca92e5a76f68065667805afcd38524d425183a8d22044dadae36944dcf75283	0x1ccb4d4f9221d6ea6a4f49df09223bd99d2cce9a204ebb83f2b736a16da7fee5	bb968dfed8f7aa37df7032f58cd4a075b3cdb501ea99951f515802626b14547d	0x008aab79713313c9ee7e9bee9b4dcbfb99e39ded2aa6a8b08c42faacc3440fd737424bac38e1ba5c0080a397b64bec6b8d62c9d27f46ecd9538df21591e7d6311b
device_62	0x6b3c67509db64c82cd75350ea6ff4453aae7b9880b1c878f5222536e210838d3	0xc67e9756b8306674d195ab82dc5b549eed013211b14f095e1ac7646b02018ebb	101ee22e2b49630a1325c246e179ca586464555d18ccc75358a63c802c678aa7	0x736e6e1a63fd9531562917cd8fdee77fa488e3542faabfb5268375aefb6f1e2037024af8e7c28efa85cd3a22551aad86dc92b59dcf7fe440acd92e41a6a7309a1b
device_63	0x08261d4b519b1baa69d1c6a7140fe630890344b1b175384e554ab55629942be4	0x599c754e0a4d71b53f868eca44f801471ab041d5c8f1f19d4f3d45a1d9c9cf06	3f7ad1809373cc7ce4b54e4bad4f2c97a7e7ed0bc5e8d935353b853d98a2d83b	0x4d8907e9bbcb5fa7ae13696f3171e68d46b7583249e1ac4c3e66a78371047e072435a6c13825eb082a955516434df1d7035ed943bb7c8d8d989cc74d2eab5fb61b
device_64	0xbd25e2062d3427de7e826a4430383be894f37ad1bbbacae8d93e5616b6497d8e	0x4a2a75a7d1ecf64690d1383b631bedf3dcd0eb9fbc586457f911d8b947cc49a4	fcfe647eca3789d244f2f6e6ae47a6ae6f576de360bd29f7d6a37711b6a6c847	0x39c8325e3c51c38467328f96d12bb97e9194b818de2b19e6339b5dd22b712a524a2875f68a8f28be60792491cf65357acdb09dfcd18e21f41e0119a39dd35e6c1b
device_65	0xacf00bd9276ea5dfbea6724a4ed1dc3d8961befe1c100d29aef41ce663973d92	0xc1ab2e6694fcf29716db6b9a5897b25861df980c9141c6b7fc5ecf4fab2c5f0c	405c255fdbcce5a68ef7a1600050705fd2cc9f175ac6da0cc69ae1e0b9e208ed	0x30dffccb4725aa8ee63acab926907bcf4a561e70f740fa8de9d5fc214bf671f84d6c30adf531dd1688299aa015cd7b35e1e5a892104b4350e6091bf8bd713b5b1b
device_66	0xcb7e48a15854188cb5604e78ec4860341085782dac4e0f36a69d9db4e802b4b5	0xd6e1999503a9155109b1dacde61cdf58c0eb57d510785c1cdf4d31f31fe74733	86e3505ea674763b04e0a41d54753db74db7076800122f47bb05d9460cb84a38	0x212e2953b4b92806ccbd29ad441923a45d13681fa01dee37ebacf1f14a9de44113c9532dd115a9530acdca13d67e493dcdf219e9a875fef6a3352ee3a390dd081c
device_67	0xa98a7d7d663d47038d0f312f0ef3eccd0098ce6dee1adff8d5ad869d906bc1ad	0x4a39f2c5b446624faf476abbd2e25d8dbe796f5f705d7980d9a584f639595514	5666b472e360ee77a5d9881c2958a77015a3a9712e2a55642d0007a3538df5db	0xa5e1db3f429f098da194988ea1d13f47499287f981082aa2aa4c713f6bf8c5243066295701deffa2399568783243750b3283e454ac2ed8a65b68549b68c06b371c
device_68	0x7ff1f2de20c34bc58ce9f1a191fe0e710fb40007306310cadf6bbeed82b2d39f	0xd12438236b6dbb5a8fc2dc391d762e2d08d945fe6a0e7a3ef97bbfb387f96a59	46981505c7446cfc3c864766d9751cae6b643975fb42b9c2b9591f3c395eeac7	0xc136fc99df86dd372c207eddf73a2cbe10702215f0275825ba51185a511b215f5e5d9e0058828892ea042d961852f7ec8f46ba8359e54eaf10c3d08f97adec151c
device_69	0xacf00bd9276ea5dfbea6724a4ed1dc3d8961befe1c100d29aef41ce663973d92	0xc1ab2e6694fcf29716db6b9a5897b25861df980c9141c6b7fc5ecf4fab2c5f0c	405c255fdbcce5a68ef7a1600050705fd2cc9f175ac6da0cc69ae1e0b9e208ed	0x30dffccb4725aa8ee63acab926907bcf4a561e70f740fa8de9d5fc214bf671f84d6c30adf531dd1688299aa015cd7b35e1e5a892104b4350e6091bf8bd713b5b1b
device_70	0xcb7e48a15854188cb5604e78ec4860341085782dac4e0f36a69d9db4e802b4b5	0xd6e1999503a9155109b1dacde61cdf58c0eb57d510785c1cdf4d31f31fe74733	86e3505ea674763b04e0a41d54753db74db7076800122f47bb05d9460cb84a38	0x212e2953b4b92806ccbd29ad441923a45d13681fa01dee37ebacf1f14a9de44113c9532dd115a9530acdca13d67e493dcdf219e9a875fef6a3352ee3a390dd081c
device_71	0xa98a7d7d663d47038d0f312f0ef3eccd0098ce6dee1adff8d5ad869d906bc1ad	0x4a39f2c5b446624faf476abbd2e25d8dbe796f5f705d7980d9a584f639595514	5666b472e360ee77a5d9881c2958a77015a3a9712e2a55642d0007a3538df5db	0xa5e1db3f429f098da194988ea1d13f47499287f981082aa2aa4c713f6bf8c5243066295701deffa2399568783243750b3283e454ac2ed8a65b68549b68c06b371c
device_72	0x7ff1f2de20c34bc58ce9f1a191fe0e710fb40007306310cadf6bbeed82b2d39f	0xd12438236b6dbb5a8fc2dc391d762e2d08d945fe6a0e7a3ef97bbfb387f96a59	46981505c7446cfc3c864766d9751cae6b643975fb42b9c2b9591f3c395eeac7	0xc136fc99df86dd372c207eddf73a2cbe10702215f0275825ba51185a511b215f5e5d9e0058828892ea042d961852f7ec8f46ba8359e54eaf10c3d08f97adec151c
device_73	0x4c01f354c39893224fb13ac0dc8e2e7fe3d9a955fb0c09d6c4bad63ee5fbf04c	0xbd86840c22a830e0582cf699c7dc6bec0b81eb9cae7d5da11d4ed539ee3e1fcf	d309681c1d9ec0b44810cda2b9630511060d08719c8d721a1e273b955e3da34c	0x325b4f460d87a1bd5ae50dc011e165f92894c6e300e64a73d60225ee0a50403c4dde564c5de766f8b28c011ae63234b7dd4194e0a65f7ce1cc7bfa745964f7ff1c
device_74	0x7794266ed997ace947546278f615009a2c4a99b9f47f4aebc9203e651e22e03a	0x2df0952b1c310af3fb6b1dd6d4746197ec70c30555dc5665d33cae7f893fce94	ee65d05a5031bc9309730e84fa55d6939533bf85115880c964dd9fc4efb35a22	0x553115c04d4803b86478eb95ec04b558e3248eb30a330bda35cbe1711d0046631b0c8c39c80094fe2984aac29704cc3ea203e763d42d7fa5860801a664e5265a1c
device_75	0x3d7be186dbbc56605580b7d622495f3abceb57314186935188391935010afddf	0x6c75e6cd1f69a2e0ea6c2fd85efaf2fa12a758fae7ba853337ce17d663fb368e	242d109c35338d717c236bff92e3f995819b21e1587bd0f675fdefe5967fe2c3	0xb40565741a1447dc9d81b0818d8000e8ce53fbe205eb06e0defe8b4df929552d653b68e19a9fe3da1bb9da27866cae9c4f6e5b1f7c9dd227480769b98b1a11e71b
device_76	0x0f5eef64176a538dba2730ba639e0a680445ba9b89ca4cb12f2bbf4e94ed904e	0x28d57a79972047813c7f5860863df6176a2f62f8fa29a52e352dd8779b1e88f10	8dd1f109f4a16495cadf0ea584e24a6008bd53d9bb0cf973d0f1b52aef1a9d05	0x66b5e1ff90385a235744527e4109a317d8cab1b5736c08ce66bc55bf4bcd80cf4b841323f94ce21d11bf414f8c0d8ffce246ee1fe8cbc08215540447395383881b
device_77	0x295d2bef1c2575e91f601cec7a9fa0af5c9175ec193810121820ea25f1138ed10	0xcb1b3c72ea73262e8f38ab7f21a2419dfafca14cdb00ad5ecf52c2c012d8316d	509fca2dfaee9bcfdd1b55fc2499bfd5351794d4b8a6c224fdb914631d9afb6f	0x27aaedc8f58d425ca6ffee6b885f4bcd3862f47c8db0480b8553058ba57e406b277dbcfdb92e51e288d7cb76521aefa9b089717e0c454cc3accaf3f493140ca21c
device_78	0x4982022fae92a0786439720509b187271469acc4e01394e7a42dd592695f7e7a	0x98213a131482ab478ac41c5bbf752eaa68a9e7bf1268a58f1b1b2249afe67ec6	55668d29f35e7b607cb1b1d129e4c16607f77a7aa312bf14098471d71aa02092	0xa76eeea867ee92bbe6c83f8b239c2a4334ab6738eb9e5ac63e99bd6078f1b3b116cf14e1a5853aefeaefd264dcc7217f7a54424c7b50d7be7f559dca7913f7ff1b
device_79	0x642e5eb079381d856016d5d8727a6a070686f5dd3c990dd6a65fcd6e9b9b5344	0x4c69a1a4aa176bf01a77431f81f38cdbbe7b62d0e4c417252f6a50131a9893e10	d550140d712f9475bfc5cb1bc3ecceb2275df5d42ec9dd75199eb0aa2e3a666f	0x67291e7bebd879d78c67b608f3d6d1d2ad7414c22696f45ad44b4f23f9e0a6376573f76dd18b2b89f2d24645c355ede90e693c7c7eb0f34b831930c4b00d0a431c
device_80	0x186eff3a727aeac84868176603d9e9a76deeb524e06b14305ff84d08d84d8f96	0xaf00d78865f3235a371223423295f43c560afd091ca9fc6629ac8ec75a3fef31	852ec1c5c39cf9aff2354497024b544257fee0dac9a03a601af5e1922a851d1f	0xe42dbc1b4e65976dc3c37e7dc87a55e1bdf5b4452c409a1c03794899dd06e8ab5205ea6b552e87eb9b21771d31c8165cc7191c88c5a1362bd942285a0612ed341b
device_81	0xaa3597926446aafef6819c18d7533724be44a8bff374b5da25626357ccc5cf45	0xf009d9555815c7c5ddd164f8fa9feabf60cb3317dd53006a42e30e56dafac5b7	866f567619e79d730bb4e8494a756be49ff0b9ac555661a66a288f80aa9d19f8	0x7a848eb6d9aca73aa06551fad77a31d8d4eab26b900512d292c7f16312af207839ab4eb890b9aed40b71f14b6329b07080eb1d4a9bc313ac310e67af6c16da281b
device_82	0x0364dad0734a802e8b54c8bec95d392b169ce346067dfd7eccf223fa2c6e471d	0x9da5e7bdf8d484c0768c1dbc228fb6aba4980013d0a171a067420ee882ea41d7	33fa7fbe155e9903b22340180e79b8d31151f005861df61e749deb13bdc434ae	0x134666ddc7ebe4cf10b5b0a4f08d95009d14fff3c8e48623a48ef77363e18f5a6adec28da2685b3f0ca1b8c20fcd23e9f65d758322ba51505ed0d15b66f60f551b
device_83	0x075671e6e867cd5e25c444a1e3e094537adaa1efe2def9f696339e4cfbc6cc6d	0x9fee80ac11a1f3db0c13733f0bbeb8a57a75ae9bf811e4e1c862a3c0507bee6a	81f4673032c2e8f70ee4578577ee4d14e24db6f119b37f90bb7003edbfe53be4	0x6d05f7a4df0ff38e6961d79184cdd1fddc6675d7a0cbc01566825d12aceb30215b08a0400018236f955f297675c17f4d8738933e303438f221271b403aff7de91b
device_84	0xacf00bd9276ea5dfbea6724a4ed1dc3d8961befe1c100d29aef41ce663973d91	0xc1ab2e6694fcf29716db6b9a5897b25861df980c9141c6b7fc5ecf4fab2c5f0c	405c255fdbcce5a68ef7a1600050705fd2cc9f175ac6da0cc69ae1e0b9e208ed	0x30dffccb4725aa8ee63acab926907bcf4a561e70f740fa8de9d5fc214bf671f84d6c30adf531dd1688299aa015cd7b35e1e5a892104b4350e6091bf8bd713b5b1b
device_85	0xcb7e48a15854188cb5604e78ec4860341085782dac4e0f36a69d9db4e802b4b4	0xd6e1999503a9155109b1dacde61cdf58c0eb57d510785c1cdf4d31f31fe74732	86e3505ea674763b04e0a41d54753db74db7076800122f47bb05d9460cb84a37	0x212e2953b4b92806ccbd29ad441923a45d13681fa01dee37ebacf1f14a9de44113c9532dd115a9530acdca13d67e493dcdf219e9a875fef6a3352ee3a390dd081c
device_86	0xa98a7d7d663d47038d0f312f0ef3eccd0098ce6dee1adff8d5ad869d906bc1ad	0x4a39f2c5b446624faf476abbd2e25d8dbe796f5f705d7980d9a584f639595513	5666b472e360ee77a5d9881c2958a77015a3a9712e2a55642d0007a3538df5db	0xa5e1db3f429f098da194988ea1d13f47499287f981082aa2aa4c713f6bf8c5243066295701deffa2399568783243750b3283e454ac2ed8a65b68549b68c06b371c
device_87	0x7ff1f2de20c34bc58ce9f1a191fe0e710fb40007306310cadf6bbeed82b2d39f	0xd12438236b6dbb5a8fc2dc391d762e2d08d945fe6a0e7a3ef97bbfb387f96a58	46981505c7446cfc3c864766d9751cae6b643975fb42b9c2b9591f3c395eeac6	0xc136fc99df86dd372c207eddf73a2cbe10702215f0275825ba51185a511b215f5e5d9e0058828892ea042d961852f7ec8f46ba8359e54eaf10c3d08f97adec151c
device_88	0x4c01f354c39893224fb13ac0dc8e2e7fe3d9a955fb0c09d6c4bad63ee5fbf04c	0xbd86840c22a830e0582cf699c7dc6bec0b81eb9cae7d5da11d4ed539ee3e1fcf	d309681c1d9ec0b44810cda2b9630511060d08719c8d721a1e273b955e3da34c	0x325b4f460d87a1bd5ae50dc011e165f92894c6e300e64a73d60225ee0a50403c4dde564c5de766f8b28c011ae63234b7dd4194e0a65f7ce1cc7bfa745964f7ff1c
device_89	0x7794266ed997ace947546278f615009a2c4a99b9f47f4aebc9203e651e22e03a	0x2df0952b1c310af3fb6b1dd6d4746197ec70c30555dc5665d33cae7f893fce93	ee65d05a5031bc9309730e84fa55d6939533bf85115880c964dd9fc4efb35a21	0x553115c04d4803b86478eb95ec04b558e3248eb30a330bda35cbe1711d0046631b0c8c39c80094fe2984aac29704cc3ea203e763d42d7fa5860801a664e5265a1c
device_90	0x3d7be186dbbc56605580b7d622495f3abceb57314186935188391935010afddf	0x6c75e6cd1f69a2e0ea6c2fd85efaf2fa12a758fae7ba853337ce17d663fb368e	242d109c35338d717c236bff92e3f995819b21e1587bd0f675fdefe5967fe2c2	0xb40565741a1447dc9d81b0818d8000e8ce53fbe205eb06e0defe8b4df929552d653b68e19a9fe3da1bb9da27866cae9c4f6e5b1f7c9dd227480769b98b1a11e71b
device_91	0x0f5eef64176a538dba2730ba639e0a680445ba9b89ca4cb12f2bbf4e94ed904e	0x28d57a79972047813c7f5860863df6176a2f62f8fa29a52e352dd8779b1e88f9	8dd1f109f4a16495cadf0ea584e24a6008bd53d9bb0cf973d0f1b52aef1a9d04	0x66b5e1ff90385a235744527e4109a317d8cab1b5736c08ce66bc55bf4bcd80cf4b841323f94ce21d11bf414f8c0d8ffce246ee1fe8cbc08215540447395383881b
device_92	0x295d2bef1c2575e91f601cec7a9fa0af5c9175ec193810121820ea25f1138ed9	0xcb1b3c72ea73262e8f38ab7f21a2419dfafca14cdb00ad5ecf52c2c012d8316d	509fca2dfaee9bcfdd1b55fc2499bfd5351794d4b8a6c224fdb914631d9afb6f	0x27aaedc8f58d425ca6ffee6b885f4bcd3862f47c8db0480b8553058ba57e406b277dbcfdb92e51e288d7cb76521aefa9b089717e0c454cc3accaf3f493140ca21c
device_93	0x4982022fae92a0786439720509b187271469acc4e01394e7a42dd592695f7e7a	0x98213a131482ab478ac41c5bbf752eaa68a9e7bf1268a58f1b1b2249afe67ec5	55668d29f35e7b607cb1b1d129e4c16607f77a7aa312bf14098471d71aa02091	0xa76eeea867ee92bbe6c83f8b239c2a4334ab6738eb9e5ac63e99bd6078f1b3b116cf14e1a5853aefeaefd264dcc7217f7a54424c7b50d7be7f559dca7913f7ff1b
device_94	0x642e5eb079381d856016d5d8727a6a070686f5dd3c990dd6a65fcd6e9b9b5343	0x4c69a1a4aa176bf01a77431f81f38cdbbe7b62d0e4c417252f6a50131a9893e9	d550140d712f9475bfc5cb1bc3ecceb2275df5d42ec9dd75199eb0aa2e3a666f	0x67291e7bebd879d78c67b608f3d6d1d2ad7414c22696f45ad44b4f23f9e0a6376573f76dd18b2b89f2d24645c355ede90e693c7c7eb0f34b831930c4b00d0a431c
device_95	0x186eff3a727aeac84868176603d9e9a76deeb524e06b14305ff84d08d84d8f95	0xaf00d78865f3235a371223423295f43c560afd091ca9fc6629ac8ec75a3fef30	852ec1c5c39cf9aff2354497024b544257fee0dac9a03a601af5e1922a851d1f	0xe42dbc1b4e65976dc3c37e7dc87a55e1bdf5b4452c409a1c03794899dd06e8ab5205ea6b552e87eb9b21771d31c8165cc7191c88c5a1362bd942285a0612ed341b
device_96	0xaa3597926446aafef6819c18d7533724be44a8bff374b5da25626357ccc5cf44	0xf009d9555815c7c5ddd164f8fa9feabf60cb3317dd53006a42e30e56dafac5b6	866f567619e79d730bb4e8494a756be49ff0b9ac555661a66a288f80aa9d19f7	0x7a848eb6d9aca73aa06551fad77a31d8d4eab26b900512d292c7f16312af207839ab4eb890b9aed40b71f14b6329b07080eb1d4a9bc313ac310e67af6c16da281b
device_97	0x0364dad0734a802e8b54c8bec95d392b169ce346067dfd7eccf223fa2c6e471d	0x9da5e7bdf8d484c0768c1dbc228fb6aba4980013d0a171a067420ee882ea41d6	33fa7fbe155e9903b22340180e79b8d31151f005861df61e749deb13bdc434ae	0x134666ddc7ebe4cf10b5b0a4f08d95009d14fff3c8e48623a48ef77363e18f5a6adec28da2685b3f0ca1b8c20fcd23e9f65d758322ba51505ed0d15b66f60f551b
device_98	0x075671e6e867cd5e25c444a1e3e094537adaa1efe2def9f696339e4cfbc6cc6d	0x9fee80ac11a1f3db0c13733f0bbeb8a57a75ae9bf811e4e1c862a3c0507bee6a	81f4673032c2e8f70ee4578577ee4d14e24db6f119b37f90bb7003edbfe53be3	0x6d05f7a4df0ff38e6961d79184cdd1fddc6675d7a0cbc01566825d12aceb30215b08a0400018236f955f297675c17f4d8738933e303438f221271b403aff7de91b
device_99	0x2550863b4b7b5f951ced22eb7df789b894cd39c5280ffd3ce2a24145ec88feaf	0xf5f1988937769d454ddcf17997ed4963c61ee42e7e62936c7a9ef8449fbbc477	bcf61987da0a8c78dc00a46c7d9259a1ddfbd001509d574dcda7476ef7227b98	0x8c13f17609b88b772e74325d1f3bcf74b681552fb11293d158065ea34a0f7db12c929c7cbe49cfe8f6a66739c7f08ce3150370e9f9344025c400eb51056a554b1c
device_100	0x7a7c5ab7733c0867b000fa91cd7bfdd0cc51b1e6d783bb8ea5374489d0f5b59e	0xa9a857a2eb92d99cf9d31e7538895d1892f19c923b85d51969ec9009359015a2	e578782c68b53e181eb04ce6b0a42fe8141af18f26f888d7228d61cfffa0c4f10	0xd41d3eb56a9261bd00b56c77ff8a27a5bf647e88743de250bfb5a5014eb1cb2b5724554a2faa9323a7f13822b565070f34d6111b9545d54d2fa1dbe99d23eaeb1b

## Sheet: transaction cost
Tests	Transaction cost
	Intrn-1	Intrn-2	Intrn-3	Intrn-4	Intrn-5	Intrn-6	Intrn-7	Intrn-8	Intrn-9	Intrn-10	Intrn-11	Intrn-12	Intrn-13	Intrn-14	Intrn-15	Intrn-16	Intrn-17	Intrn-18	Intrn-19	Intrn-20	Intrn-21	Intrn-22	Intrn-23	Intrn-24	Intrn-25	Intrn-26	Intrn-27	Intrn-28	Intrn-29	Intrn-30	Intrn-31	Intrn-32	Intrn-33	Intrn-34	Intrn-35	Intrn-36	Intrn-37	Intrn-38	Intrn-39	Intrn-40	Intrn-41	Intrn-42	Intrn-43	Intrn-44	Intrn-45	Intrn-46	Intrn-47	Intrn-48	Intrn-49
test 1	95787	33750	95787	95787	95787	95787	95787	95787	95787	95787	95787	95787	95787	95787	95787	95787	95787	95787	95787	95787	95787	95787	95787	95787	95787	95787	95787	95787	95787	95787	95787	95787	95787	95787	95787	95787	95787	95787	95787	95787	95787	95787	95787	95787	95787	95787	95787	95787	95787
test 2	96962	96974	96974	96974	96974	96978.8	96981.2	96983.6	96986	96988.4	96990.8	96993.2	96995.6	96998	97000.4	97002.8	97005.2	97007.6	97010	97012.4	97014.8	97017.2	97019.6	97022	97024.4	97026.8	97029.2	97031.6	97034	97036.4	97038.8	97041.2	97043.6	97046	97048.4	97050.8	97053.2	97055.6	97058	97060.4	97062.8	97065.2	97067.6	97070	97072.4	97074.8	97077.2	97079.6	97082
test 3	70198	70698	76286	76298	76298	76306	76312	76318	76324	76330	76336	76342	76348	76354	76360	76366	76372	76378	76384	76390	77474	77638.2	77802.4	77966.6	78130.8	78295	78459.2	78623.5	78787.7	78951.9	79116.1	79280.3	79444.5	79608.7	79772.9	79937.1	80101.3	80265.5	80429.7	80593.9	80758.1	80922.3	81086.5	81250.7	81414.9	81579.1	81743.3	81907.5	82071.7
test 4	0	0	0	0	0	0	0	0	0	0	0	0	0	0	0	0	0	0	0	0	0	0	0	0	0	0	0	0	0	0	0	0	0	0	0	0	0	0	0	0	0	0	0	0	0	0	0	0	0
test 5	29577	29577	29565	29577	29577	29574.6	29574.6	29574.6	29574.6	29574.6	29574.6	29574.6	29574.6	29574.6	29574.6	29574.6	29574.6	29574.6	29574.6	29574.6	29574.6	29574.6	29574.6	29574.6	29574.6	29574.6	29574.6	29574.6	29574.6	29574.6	29574.6	29574.6	29574.6	29574.6	29574.6	29574.6	29574.6	29574.6	29574.6	29574.6	29574.6	29574.6	29574.6	29574.6	29574.6	29574.6	29574.6	29574.6	29574.6
test 6	56916	56928	56916	56928	56928	56930.4	56932.8	56935.2	56937.6	56940	56942.4	56944.8	56947.2	56949.6	56952	56954.4	56956.8	56959.2	56961.6	56964	56966.4	56968.8	56971.2	56973.6	56976	56978.4	56980.8	56983.2	56985.6	56988	56990.4	56992.8	56995.2	56997.6	57000	57002.4	57004.8	57007.2	57009.6	57012	57014.4	57016.8	57019.2	57021.6	57024	57026.4	57028.8	57031.2	57033.6
test 7	65002	65002	64990	65002	65002	64999.6	64999.6	64999.6	64999.6	64999.6	64999.6	64999.6	64999.6	64999.6	64999.6	64999.6	64999.6	64999.6	64999.6	64999.6	64999.6	64999.6	64999.6	64999.6	64999.6	64999.6	64999.6	64999.6	64999.6	64999.6	64999.6	64999.6	64999.6	64999.6	64999.6	64999.6	64999.6	64999.6	64999.6	64999.6	64999.6	64999.6	64999.6	64999.6	64999.6	64999.6	64999.6	64999.6	64999.6
Average	59206	50418.4	60074	60080.9	60080.9	60082.3	60083.9	60085.4	60087	60088.5	60090.1	60091.6	60093.1	60094.7	60096.2	60097.8	60099.3	60100.9	60102.4	60103.9	60259.5	60283.6	60307.8	60331.9	60356.1	60380.2	60404.3	60428.5	60452.6	60476.8	60500.9	60525.1	60549.2	60573.4	60597.5	60621.6	60645.8	60669.9	60694.1	60718.2	60742.4	60766.5	60790.6	60814.8	60838.9	60863.1	60887.2	60911.4	60935.5
[truncated: 51 more columns]

## Sheet: execution cost
Tests	Execution cost
	Intrn-1	Intrn-2	Intrn-3	Intrn-4	Intrn-5	Intrn-6	Intrn-7	Intrn-8	Intrn-9	Intrn-10	Intrn-11	Intrn-12	Intrn-13	Intrn-14	Intrn-15	Intrn-16	Intrn-17	Intrn-18	Intrn-19	Intrn-20	Intrn-21	Intrn-22	Intrn-23	Intrn-24	Intrn-25	Intrn-26	Intrn-27	Intrn-28	Intrn-29	Intrn-30	Intrn-31	Intrn-32	Intrn-33	Intrn-34	Intrn-35	Intrn-36	Intrn-37	Intrn-38	Intrn-39	Intrn-40	Intrn-41	Intrn-42	Intrn-43	Intrn-44	Intrn-45	Intrn-46	Intrn-47	Intrn-48	Intrn-49
test 1	73331	71294	73331	73331	73331	73331	73332	73331	73332	73333	73334	73334	73336	73335	73335	73338	73338	73339	73339	73339	73510.8	73537.4	73563.9	73590.4	73617	73643.5	73670.1	73696.6	73723.1	73749.7	73776.2	73802.7	73829.3	73855.8	73882.4	73908.9	73935.4	73962	73988.5	74015	74041.6	74068.1	74094.6	74121.2	74147.7	74174.3	74200.8	74227.3	74253.9
test 2	78198	78198	78198	78198	78198	78198	78198	78198	78198	78198	78198	78198	78198	78198	78198	78198	78198	78198	78198	78198	78198	78198	78198	78198	78198	78198	78198	78198	78198	78198	78198	78198	78198	78198	78198	78198	78198	78198	78198	78198	78198	78198	78198	78198	78198	78198	78198	78198	78198
test 3	55886	55786	55986	55987	55987	55988	55988	55988	55989	55989	55989	55990	55989	55989	55991	55989	55990	55990	55991	55991	56472.9	56546.2	56619.5	56692.7	56766	56839.3	56912.5	56985.8	57059.1	57132.3	57205.6	57278.9	57352.1	57425.4	57498.7	57571.9	57645.2	57718.4	57791.7	57865	57938.2	58011.5	58084.8	58158	58231.3	58304.6	58377.8	58451.1	58524.4
test 4	12613	12614	12613	12613	12613	12614	12613	12613	12613	12614	12613	12613	12617	12613	12613	12613	12617	12613	12613	12614	12615.1	12615.2	12615.4	12615.5	12615.6	12615.7	12615.8	12615.9	12616	12616.1	12616.2	12616.4	12616.5	12616.6	12616.7	12616.8	12616.9	12617	12617.1	12617.3	12617.4	12617.5	12617.6	12617.7	12617.8	12617.9	12618	12618.2	12618.3
test 5	9601	9601	9602	9601	9601	9602	9601	9601	9602	9601	9601	9602	9601	9601	9603	9601	9601	9601	9601	9603	9603.36	9603.43	9603.49	9603.55	9603.62	9603.68	9603.74	9603.81	9603.87	9603.93	9603.99	9604.06	9604.12	9604.18	9604.25	9604.31	9604.37	9604.44	9604.5	9604.56	9604.63	9604.69	9604.75	9604.82	9604.88	9604.94	9605.01	9605.07	9605.13
test 6	35384	35384	35384	35384	35384	35384	35384	35384	35384	35385	35385	35385	35385	35385	35385	35385	35386	35386	35386	35387	35386.6	35386.7	35386.8	35387	35387.1	35387.2	35387.3	35387.5	35387.6	35387.7	35387.8	35388	35388.1	35388.2	35388.3	35388.4	35388.6	35388.7	35388.8	35388.9	35389.1	35389.2	35389.3	35389.4	35389.6	35389.7	35389.8	35389.9	35390
test 7	44146	44146	44146	44146	44146	44146	44146	44146	44146	44146	44146	44146	44146	44146	44146	44146	44146	44146	44146	44147	44147.3	44147.4	44147.4	44147.5	44147.6	44147.6	44147.7	44147.8	44147.8	44147.9	44148	44148	44148.1	44148.2	44148.2	44148.3	44148.4	44148.4	44148.5	44148.6	44148.6	44148.7	44148.8	44148.8	44148.9	44148.9	44149	44149.1	44149.1
Average	44165.6	43860.4	44180	44180	44180	44180.4	44180.3	44180.1	44180.6	44180.9	44180.9	44181.1	44181.7	44181	44181.6	44181.4	44182.3	44181.9	44182	44182.7	44276.3	44290.6	44304.9	44319.2	44333.5	44347.9	44362.2	44376.5	44390.8	44405.1	44419.4	44433.7	44448	44462.3	44476.6	44491	44505.3	44519.6	44533.9	44548.2	44562.5	44576.8	44591.1	44605.4	44619.7	44634	44648.4	44662.7	44677
[truncated: 51 more columns]

## Sheet: gas consumption
Tests	Gas
	Intrn-1	Intrn-2	Intrn-3	Intrn-4	Intrn-5	Intrn-6	Intrn-7	Intrn-8	Intrn-9	Intrn-10	Intrn-11	Intrn-12	Intrn-13	Intrn-14	Intrn-15	Intrn-16	Intrn-17	Intrn-18	Intrn-19	Intrn-20	Intrn-21	Intrn-22	Intrn-23	Intrn-24	Intrn-25	Intrn-26	Intrn-27	Intrn-28	Intrn-29	Intrn-30	Intrn-31	Intrn-32	Intrn-33	Intrn-34	Intrn-35	Intrn-36	Intrn-37	Intrn-38	Intrn-39	Intrn-40	Intrn-41	Intrn-42	Intrn-43	Intrn-44	Intrn-45	Intrn-46	Intrn-47	Intrn-48	Intrn-49
test 1	110156	38813	110156	110156	110156	110156	110156	110156	110156	110156	110156	110156	110156	110156	110156	110156	110156	110156	110156	110156	110156	110156	110156	110156	110156	110156	110156	110156	110156	110156	110156	110156	110156	110156	110156	110156	110156	110156	110156	110156	110156	110156	110156	110156	110156	110156	110156	110156	110156
test 2	117947	117961	117961	117961	117961	117961	117961	117961	117961	117961	117961	117961	117961	117961	117961	117961	117961	117961	117961	117961	117962	117963	117963	117963	117963	117963	117964	117964	117964	117964	117964	117965	117965	117965	117965	117965	117966	117966	117966	117966	117966	117967	117967	117967	117967	117967	117968	117968	117968
test 3	81168	87743	94169	94183	94183	94192.3	94199.3	94206.3	94213.3	94220.3	94227.3	94234.3	94241.3	94248.3	94255.3	94262.3	94269.3	94276.3	94283.3	94290.3	94297.3	94304.3	94311.3	94318.3	94325.3	94332.3	94339.3	94346.3	94353.3	94360.3	94367.3	94374.3	94381.3	94388.3	94395.3	94402.3	94409.3	94416.3	94423.3	94430.3	94437.3	94444.3	94451.3	94458.3	94465.3	94472.3	94479.3	94486.3	94493.3
test 4	0	0	0	0	0	0	0	0	0	0	0	0	0	0	0	0	0	0	0	0	0	0	0	0	0	0	0	0	0	0	0	0	0	0	0	0	0	0	0	0	0	0	0	0	0	0	0	0	0
test 5	40454	40454	40440	40454	40454	40451.2	40451.2	40451.2	40451.2	40451.2	40451.2	40451.2	40451.2	40451.2	40451.2	40451.2	40451.2	40451.2	40451.2	40451.2	40451.2	40451.2	40451.2	40451.2	40451.2	40451.2	40451.2	40451.2	40451.2	40451.2	40451.2	40451.2	40451.2	40451.2	40451.2	40451.2	40451.2	40451.2	40451.2	40451.2	40451.2	40451.2	40451.2	40451.2	40451.2	40451.2	40451.2	40451.2	40451.2
test 6	71894	71908	71894	71908	71908	71910.8	71913.6	71916.4	71919.2	71922	71924.8	71927.6	71930.4	71933.2	71936	71938.8	71941.6	71944.4	71947.2	71950	71952.8	71955.6	71958.4	71961.2	71964	71966.8	71969.6	71972.4	71975.2	71978	71980.8	71983.6	71986.4	71989.2	71992	71994.8	71997.6	72000.4	72003.2	72006	72008.8	72011.6	72014.4	72017.2	72020	72022.8	72025.6	72028.4	72031.2
test 7	81193	81193	81179	81193	81193	81190.2	81190.2	81190.2	81190.2	81190.2	81190.2	81190.2	81190.2	81190.2	81190.2	81190.2	81190.2	81190.2	81190.2	81190.2	81190.2	81190.2	81190.2	81190.2	81190.2	81190.2	81190.2	81190.2	81190.2	81190.2	81190.2	81190.2	81190.2	81190.2	81190.2	81190.2	81190.2	81190.2	81190.2	81190.2	81190.2	81190.2	81190.2	81190.2	81190.2	81190.2	81190.2	81190.2	81190.2
Average	71830.3	62581.7	73685.6	73693.6	73693.6	73694.5	73695.9	73697.3	73698.7	73700.1	73701.5	73702.9	73704.3	73705.7	73707.1	73708.5	73709.9	73711.3	73712.7	73714.1	73715.7	73717.1	73718.6	73720	73721.4	73722.8	73724.3	73725.7	73727.1	73728.6	73730	73731.4	73732.8	73734.3	73735.7	73737.1	73738.6	73740	73741.4	73742.8	73744.3	73745.7	73747.1	73748.6	73750	73751.4	73752.8	73754.3	73755.7
[truncated: 51 more columns]

## Sheet: energy consumption
Interactions	Avg Execution cost	Energy Consumption (Joules)
Intrn-1	44165.6	9.27477e-05
Intrn-2	43860.4	9.21069e-05
Intrn-3	44180	9.2778e-05
Intrn-4	44180	9.2778e-05
Intrn-5	44180	9.2778e-05
Intrn-6	44180.4	9.27789e-05
Intrn-7	44180.3	9.27786e-05
Intrn-8	44180.1	9.27783e-05
Intrn-9	44180.6	9.27792e-05
Intrn-10	44180.9	9.27798e-05
Intrn-11	44180.9	9.27798e-05
Intrn-12	44181.1	9.27804e-05
Intrn-13	44181.7	9.27816e-05
Intrn-14	44181	9.27801e-05
Intrn-15	44181.6	9.27813e-05
Intrn-16	44181.4	9.2781e-05
Intrn-17	44182.3	9.27828e-05
Intrn-18	44181.9	9.27819e-05
Intrn-19	44182	9.27822e-05
Intrn-20	44182.7	9.27837e-05
Intrn-21	44276.3	9.29802e-05
Intrn-22	44290.6	9.30103e-05
Intrn-23	44304.9	9.30403e-05
Intrn-24	44319.2	9.30704e-05
Intrn-25	44333.5	9.31004e-05
Intrn-26	44347.9	9.31305e-05
Intrn-27	44362.2	9.31605e-05
Intrn-28	44376.5	9.31906e-05
Intrn-29	44390.8	9.32206e-05
Intrn-30	44405.1	9.32507e-05
Intrn-31	44419.4	9.32807e-05
Intrn-32	44433.7	9.33108e-05
Intrn-33	44448	9.33408e-05
Intrn-34	44462.3	9.33709e-05
Intrn-35	44476.6	9.34009e-05
Intrn-36	44491	9.3431e-05
Intrn-37	44505.3	9.3461e-05
Intrn-38	44519.6	9.34911e-05
Intrn-39	44533.9	9.35211e-05
Intrn-40	44548.2	9.35512e-05
Intrn-41	44562.5	9.35812e-05
Intrn-42	44576.8	9.36113e-05
Intrn-43	44591.1	9.36413e-05
Intrn-44	44605.4	9.36714e-05
Intrn-45	44619.7	9.37014e-05
Intrn-46	44634	9.37315e-05
Intrn-47	44648.4	9.37615e-05
Intrn-48	44662.7	9.37916e-05
Intrn-49	44677	9.38216e-05
Intrn-50	44691.3	9.38517e-05
Intrn-51	44705.6	9.38817e-05
Intrn-52	44719.9	9.39118e-05
Intrn-53	44734.2	9.39418e-05
Intrn-54	44748.5	9.39719e-05
Intrn-55	44762.8	9.40019e-05
Intrn-56	44777.1	9.4032e-05
Intrn-57	44791.5	9.4062e-05
Intrn-58	44805.8	9.40921e-05
Intrn-59	44820.1	9.41221e-05
Intrn-60	44834.4	9.41522e-05
Intrn-61	44848.7	9.41822e-05
Intrn-62	44863	9.42123e-05
Intrn-63	44877.3	9.42423e-05
Intrn-64	44891.6	9.42724e-05
Intrn-65	44905.9	9.43024e-05
Intrn-66	44920.2	9.43325e-05
Intrn-67	44934.5	9.43625e-05
Intrn-68	44948.9	9.43926e-05
Intrn-69	44963.2	9.44226e-05
Intrn-70	44977.5	9.44527e-05
Intrn-71	44991.8	9.44827e-05
Intrn-72	45006.1	9.45128e-05
Intrn-73	45020.4	9.45428e-05
Intrn-74	45034.7	9.45729e-05
Intrn-75	45049	9.46029e-05
Intrn-76	45063.3	9.4633e-05
Intrn-77	45077.6	9.46631e-05
Intrn-78	45092	9.46931e-05
Intrn-79	45106.3	9.47232e-05
Intrn-80	45120.6	9.47532e-05
Intrn-81	45134.9	9.47833e-05
Intrn-82	45149.2	9.48133e-05
Intrn-83	45163.5	9.48434e-05
Intrn-84	45177.8	9.48734e-05
Intrn-85	45192.1	9.49035e-05
Intrn-86	45206.4	9.49335e-05
Intrn-87	45220.7	9.49636e-05
Intrn-88	45235	9.49936e-05
Intrn-89	45249.4	9.50237e-05
Intrn-90	45263.7	9.50537e-05
Intrn-91	45278	9.50838e-05
Intrn-92	45292.3	9.51138e-05
Intrn-93	45306.6	9.51439e-05
Intrn-94	45320.9	9.51739e-05
Intrn-95	45335.2	9.5204e-05
Intrn-96	45349.5	9.5234e-05
Intrn-97	45363.8	9.52641e-05
Intrn-98	45378.1	9.52941e-05
Intrn-99	45392.5	9.53242e-05
Intrn-100	45406.8	9.53542e-05

## Sheet: execution time
Interactions	Execution time (ms)
Intrn-1	44.1656
Intrn-2	43.8604
Intrn-3	44.18
Intrn-4	44.18
Intrn-5	44.18
Intrn-6	44.1804
Intrn-7	44.1803
Intrn-8	44.1801
Intrn-9	44.1806
Intrn-10	44.1809
Intrn-11	44.1809
Intrn-12	44.1811
Intrn-13	44.1817
Intrn-14	44.181
Intrn-15	44.1816
Intrn-16	44.1814
Intrn-17	44.1823
Intrn-18	44.1819
Intrn-19	44.182
Intrn-20	44.1827
Intrn-21	44.2763
Intrn-22	44.2906
Intrn-23	44.3049
Intrn-24	44.3192
Intrn-25	44.3335
Intrn-26	44.3479
Intrn-27	44.3622
Intrn-28	44.3765
Intrn-29	44.3908
Intrn-30	44.4051
Intrn-31	44.4194
Intrn-32	44.4337
Intrn-33	44.448
Intrn-34	44.4623
Intrn-35	44.4766
Intrn-36	44.491
Intrn-37	44.5053
Intrn-38	44.5196
Intrn-39	44.5339
Intrn-40	44.5482
Intrn-41	44.5625
Intrn-42	44.5768
Intrn-43	44.5911
Intrn-44	44.6054
Intrn-45	44.6197
Intrn-46	44.634
Intrn-47	44.6484
Intrn-48	44.6627
Intrn-49	44.677
Intrn-50	44.6913
Intrn-51	44.7056
Intrn-52	44.7199
Intrn-53	44.7342
Intrn-54	44.7485
Intrn-55	44.7628
Intrn-56	44.7771
Intrn-57	44.7915
Intrn-58	44.8058
Intrn-59	44.8201
Intrn-60	44.8344
Intrn-61	44.8487
Intrn-62	44.863
Intrn-63	44.8773
Intrn-64	44.8916
Intrn-65	44.9059
Intrn-66	44.9202
Intrn-67	44.9345
Intrn-68	44.9489
Intrn-69	44.9632
Intrn-70	44.9775
Intrn-71	44.9918
Intrn-72	45.0061
Intrn-73	45.0204
Intrn-74	45.0347
Intrn-75	45.049
Intrn-76	45.0633
Intrn-77	45.0776
Intrn-78	45.092
Intrn-79	45.1063
Intrn-80	45.1206
Intrn-81	45.1349
Intrn-82	45.1492
Intrn-83	45.1635
Intrn-84	45.1778
Intrn-85	45.1921
Intrn-86	45.2064
Intrn-87	45.2207
Intrn-88	45.235
Intrn-89	45.2494
Intrn-90	45.2637
Intrn-91	45.278
Intrn-92	45.2923
Intrn-93	45.3066
Intrn-94	45.3209
Intrn-95	45.3352
Intrn-96	45.3495
Intrn-97	45.3638
Intrn-98	45.3781
Intrn-99	45.3925
Intrn-100	45.4068

## Sheet: transaction time
Interactions	Avg Execution cost	Execution time (ms)	Transaction time (s)
Intrn-1	44165.6	44.1656	14.0442
Intrn-2	43860.4	43.8604	14.0439
Intrn-3	44180	44.18	14.0442
Intrn-4	44180	44.18	14.0442
Intrn-5	44180	44.18	14.0442
Intrn-6	44180.4	44.1804	14.0442
Intrn-7	44180.3	44.1803	14.0442
Intrn-8	44180.1	44.1801	14.0442
Intrn-9	44180.6	44.1806	14.0442
Intrn-10	44180.9	44.1809	14.0442
Intrn-11	44180.9	44.1809	14.0442
Intrn-12	44181.1	44.1811	14.0442
Intrn-13	44181.7	44.1817	14.0442
Intrn-14	44181	44.181	14.0442
Intrn-15	44181.6	44.1816	14.0442
Intrn-16	44181.4	44.1814	14.0442
Intrn-17	44182.3	44.1823	14.0442
Intrn-18	44181.9	44.1819	14.0442
Intrn-19	44182	44.182	14.0442
Intrn-20	44182.7	44.1827	14.0442
Intrn-21	44276.3	44.2763	14.0443
Intrn-22	44290.6	44.2906	14.0443
Intrn-23	44304.9	44.3049	14.0443
Intrn-24	44319.2	44.3192	14.0443
Intrn-25	44333.5	44.3335	14.0443
Intrn-26	44347.9	44.3479	14.0443
Intrn-27	44362.2	44.3622	14.0444
Intrn-28	44376.5	44.3765	14.0444
Intrn-29	44390.8	44.3908	14.0444
Intrn-30	44405.1	44.4051	14.0444
Intrn-31	44419.4	44.4194	14.0444
Intrn-32	44433.7	44.4337	14.0444
Intrn-33	44448	44.448	14.0444
Intrn-34	44462.3	44.4623	14.0445
Intrn-35	44476.6	44.4766	14.0445
Intrn-36	44491	44.491	14.0445
Intrn-37	44505.3	44.5053	14.0445
Intrn-38	44519.6	44.5196	14.0445
Intrn-39	44533.9	44.5339	14.0445
Intrn-40	44548.2	44.5482	14.0445
Intrn-41	44562.5	44.5625	14.0446
Intrn-42	44576.8	44.5768	14.0446
Intrn-43	44591.1	44.5911	14.0446
Intrn-44	44605.4	44.6054	14.0446
Intrn-45	44619.7	44.6197	14.0446
Intrn-46	44634	44.634	14.0446
Intrn-47	44648.4	44.6484	14.0446
Intrn-48	44662.7	44.6627	14.0447
Intrn-49	44677	44.677	14.0447
Intrn-50	44691.3	44.6913	14.0447
Intrn-51	44705.6	44.7056	14.0447
Intrn-52	44719.9	44.7199	14.0447
Intrn-53	44734.2	44.7342	14.0447
Intrn-54	44748.5	44.7485	14.0447
Intrn-55	44762.8	44.7628	14.0448
Intrn-56	44777.1	44.7771	14.0448
Intrn-57	44791.5	44.7915	14.0448
Intrn-58	44805.8	44.8058	14.0448
Intrn-59	44820.1	44.8201	14.0448
Intrn-60	44834.4	44.8344	14.0448
Intrn-61	44848.7	44.8487	14.0448
Intrn-62	44863	44.863	14.0449
Intrn-63	44877.3	44.8773	14.0449
Intrn-64	44891.6	44.8916	14.0449
Intrn-65	44905.9	44.9059	14.0449
Intrn-66	44920.2	44.9202	14.0449
Intrn-67	44934.5	44.9345	14.0449
Intrn-68	44948.9	44.9489	14.0449
Intrn-69	44963.2	44.9632	14.045
Intrn-70	44977.5	44.9775	14.045
Intrn-71	44991.8	44.9918	14.045
Intrn-72	45006.1	45.0061	14.045
Intrn-73	45020.4	45.0204	14.045
Intrn-74	45034.7	45.0347	14.045
Intrn-75	45049	45.049	14.045
Intrn-76	45063.3	45.0633	14.0451
Intrn-77	45077.6	45.0776	14.0451
Intrn-78	45092	45.092	14.0451
Intrn-79	45106.3	45.1063	14.0451
Intrn-80	45120.6	45.1206	14.0451
Intrn-81	45134.9	45.1349	14.0451
Intrn-82	45149.2	45.1492	14.0451
Intrn-83	45163.5	45.1635	14.0452
Intrn-84	45177.8	45.1778	14.0452
Intrn-85	45192.1	45.1921	14.0452
Intrn-86	45206.4	45.2064	14.0452
Intrn-87	45220.7	45.2207	14.0452
Intrn-88	45235	45.235	14.0452
Intrn-89	45249.4	45.2494	14.0452
Intrn-90	45263.7	45.2637	14.0453
Intrn-91	45278	45.278	14.0453
Intrn-92	45292.3	45.2923	14.0453
Intrn-93	45306.6	45.3066	14.0453
Intrn-94	45320.9	45.3209	14.0453
Intrn-95	45335.2	45.3352	14.0453
Intrn-96	45349.5	45.3495	14.0453
Intrn-97	45363.8	45.3638	14.0454
Intrn-98	45378.1	45.3781	14.0454
Intrn-99	45392.5	45.3925	14.0454
Intrn-100	45406.8	45.4068	14.0454

## Sheet: transaction throughput
Interactions	Transaction time (s)	Transaction throughput (trans/second)
Intrn-1	14.0442	0.0712039
Intrn-2	14.0439	0.0712055
Intrn-3	14.0442	0.0712039
Intrn-4	14.0442	0.0712039
Intrn-5	14.0442	0.0712039
Intrn-6	14.0442	0.0712039
Intrn-7	14.0442	0.0712039
Intrn-8	14.0442	0.0712039
Intrn-9	14.0442	0.0712039
Intrn-10	14.0442	0.0712039
Intrn-11	14.0442	0.0712039
Intrn-12	14.0442	0.0712039
Intrn-13	14.0442	0.0712039
Intrn-14	14.0442	0.0712039
Intrn-15	14.0442	0.0712039
Intrn-16	14.0442	0.0712039
Intrn-17	14.0442	0.0712039
Intrn-18	14.0442	0.0712039
Intrn-19	14.0442	0.0712039
Intrn-20	14.0442	0.0712039
Intrn-21	14.0443	0.0712034
Intrn-22	14.0443	0.0712033
Intrn-23	14.0443	0.0712032
Intrn-24	14.0443	0.0712032
Intrn-25	14.0443	0.0712031
Intrn-26	14.0443	0.071203
Intrn-27	14.0444	0.0712029
Intrn-28	14.0444	0.0712029
Intrn-29	14.0444	0.0712028
Intrn-30	14.0444	0.0712027
Intrn-31	14.0444	0.0712027
Intrn-32	14.0444	0.0712026
Intrn-33	14.0444	0.0712025
Intrn-34	14.0445	0.0712024
Intrn-35	14.0445	0.0712024
Intrn-36	14.0445	0.0712023
Intrn-37	14.0445	0.0712022
Intrn-38	14.0445	0.0712022
Intrn-39	14.0445	0.0712021
Intrn-40	14.0445	0.071202
Intrn-41	14.0446	0.0712019
Intrn-42	14.0446	0.0712019
Intrn-43	14.0446	0.0712018
Intrn-44	14.0446	0.0712017
Intrn-45	14.0446	0.0712016
Intrn-46	14.0446	0.0712016
Intrn-47	14.0446	0.0712015
Intrn-48	14.0447	0.0712014
Intrn-49	14.0447	0.0712014
Intrn-50	14.0447	0.0712013
Intrn-51	14.0447	0.0712012
Intrn-52	14.0447	0.0712011
Intrn-53	14.0447	0.0712011
Intrn-54	14.0447	0.071201
Intrn-55	14.0448	0.0712009
Intrn-56	14.0448	0.0712008
Intrn-57	14.0448	0.0712008
Intrn-58	14.0448	0.0712007
Intrn-59	14.0448	0.0712006
Intrn-60	14.0448	0.0712006
Intrn-61	14.0448	0.0712005
Intrn-62	14.0449	0.0712004
Intrn-63	14.0449	0.0712003
Intrn-64	14.0449	0.0712003
Intrn-65	14.0449	0.0712002
Intrn-66	14.0449	0.0712001
Intrn-67	14.0449	0.0712
Intrn-68	14.0449	0.0712
Intrn-69	14.045	0.0711999
Intrn-70	14.045	0.0711998
Intrn-71	14.045	0.0711998
Intrn-72	14.045	0.0711997
Intrn-73	14.045	0.0711996
Intrn-74	14.045	0.0711995
Intrn-75	14.045	0.0711995
Intrn-76	14.0451	0.0711994
Intrn-77	14.0451	0.0711993
Intrn-78	14.0451	0.0711992
Intrn-79	14.0451	0.0711992
Intrn-80	14.0451	0.0711991
Intrn-81	14.0451	0.071199
Intrn-82	14.0451	0.071199
Intrn-83	14.0452	0.0711989
Intrn-84	14.0452	0.0711988
Intrn-85	14.0452	0.0711987
Intrn-86	14.0452	0.0711987
Intrn-87	14.0452	0.0711986
Intrn-88	14.0452	0.0711985
Intrn-89	14.0452	0.0711985
Intrn-90	14.0453	0.0711984
Intrn-91	14.0453	0.0711983
Intrn-92	14.0453	0.0711982
Intrn-93	14.0453	0.0711982
Intrn-94	14.0453	0.0711981
Intrn-95	14.0453	0.071198
Intrn-96	14.0453	0.0711979
Intrn-97	14.0454	0.0711979
Intrn-98	14.0454	0.0711978
Intrn-99	14.0454	0.0711977
Intrn-100	14.0454	0.0711977
